# Supplementary material for: Abscisic Acid Regulates Root Elongation Through the Activities of Auxin and Ethylene in Arabidopsis thaliana
Source: PubMed Central journal article supplement (PMC4455775; doi:10.1534/g3.114.011080), 2014-05-15
Supplement: supp_g3.114.011080_011080SI.pdf [file supp_g3.114.011080_011080SI.pdf]

**Abscisic acid regulates root elongation through the activities of auxin and ethylene in *Arabidopsis thaliana***

Julie M. Thole<sup>1</sup>, Erin R. Beisner<sup>2</sup>, James Liu<sup>3</sup>, Savina V. Venkova<sup>4</sup>, and Lucia C. Strader<sup>5</sup>

*Department of Biology, Washington University in St. Louis, St. Louis, Missouri 63130*

<sup>1</sup>*Present address: Department of Biology, Saint Louis University, St. Louis, Missouri 63103*

<sup>2</sup>*Present address: Department of Medicinal Chemistry and Pharmacognosy, University of Illinois at Chicago, Chicago, IL 60607*

<sup>3</sup>*Present address: The University of Texas Health Science Center, San Antonio, TX 78229*

<sup>4</sup>*Department of Biochemistry and Cell Biology, Rice University, Houston, Texas 77005*

<sup>5</sup>*Corresponding author: Department of Biology, CB-1137, Washington University, One Brookings Drive, St. Louis, MO 63130.  
Email: [strader@wustl.edu](mailto:strader@wustl.edu)*

**DOI: 10.1534/g3.114.011080**

**Table S1 Homozygous EMS-related mutations in the AR241 Exome**

| Chromosome | Location <sup>1</sup> | Reference sequence | Mutant sequence | Gene      | Amino acid change | Codon change |
|------------|-----------------------|--------------------|-----------------|-----------|-------------------|--------------|
| 1          | 570351                | G                  | A               | AT1G02650 | C/Y               | tGt/tAt      |
| 1          | 776720                | G                  | A               | AT1G03190 | G/E               | gGa/gAa      |
| 1          | 792780                | G                  | A               | AT1G03240 | A/V               | gCg/gTg      |
| 1          | 1317235               | G                  | A               | AT1G04700 | R/Q               | cGg/cAg      |
| 1          | 1470175               | G                  | A               | AT1G05100 | G/E               | gGa/gAa      |
| 1          | 1751949               | G                  | A               | AT1G05820 | V/I               | Gtt/Att      |
| 1          | 2385274               | G                  | A               | AT1G07705 | E/K               | Gaa/Aaa      |
| 1          | 2812322               | G                  | A               | AT1G08790 | D/N               | Gac/Aac      |
| 1          | 2927915               | G                  | A               | AT1G09070 | G/D               | gGc/gAc      |
| 1          | 3033900               | G                  | A               | AT1G09400 | P/S               | Cct/Tct      |
| 1          | 3266046               | G                  | A               | AT1G10010 | G/D               | gGt/gAt      |
| 1          | 3367220               | G                  | A               | AT1G10280 | R/C               | Cgc/Tgc      |
| 1          | 3691108               | G                  | A               | AT1G11070 | P/L               | cCg/cTg      |
| 1          | 3818161               | G                  | A               | AT1G11350 | S/L               | tCa/tTa      |
| 1          | 4014976               | G                  | A               | AT1G11905 | A/T               | Gct/Act      |
| 1          | 4173407               | G                  | A               | AT1G12270 | G/S               | Ggt/Agt      |
| 1          | 4956980               | G                  | A               | AT1G14480 | A/T               | Gca/Aca      |
| 1          | 5427361               | G                  | A               | AT1G15770 | P/S               | Cct/Tct      |
| 1          | 5639610               | G                  | A               | AT1G16500 | S/N               | aGc/aAc      |
| 1          | 6099926               | G                  | A               | AT1G17730 | E/K               | Gaa/Aaa      |
| 1          | 6590873               | G                  | A               | AT1G19090 | G/E               | gGg/gAg      |
| 1          | 6969768               | G                  | A               | AT1G20100 | P/L               | cCg/cTg      |
| 1          | 7488007               | G                  | A               | AT1G21380 | A/V               | gCt/gTt      |
| 1          | 8065783               | G                  | A               | AT1G22770 | C/Y               | tGt/tAt      |
| 1          | 8241286               | G                  | A               | AT1G23210 | E/K               | Gag/Aag      |
| 1          | 10104331              | G                  | A               | AT1G28760 | G/R               | Gga/Aga      |
| 1          | 10217836              | G                  | A               | AT1G29240 | P/S               | Cca/Tca      |
| 1          | 12088324              | G                  | A               | AT1G33340 | D/N               | Gat/Aat      |
| 1          | 12163493              | G                  | A               | AT1G33540 | R/*               | Cga/Tga      |
| 1          | 12463233              | G                  | A               | AT1G34220 | Q/*               | Caa/Taa      |
| 1          | 13026656              | G                  | A               | AT1G35420 | D/N               | Gat/Aat      |
| 1          | 16654369              | G                  | A               | AT1G43900 | G/S               | Ggt/Agt      |
| 1          | 18018428              | G                  | A               | AT1G48720 | G/D               | gGt/gAt      |
| 1          | 18936189              | G                  | A               | AT1G51110 | G/E               | gGa/gAa      |
| 1          | 19059085              | G                  | A               | AT1G51405 | E/K               | Gaa/Aaa      |
| 1          | 20064561              | G                  | A               | AT1G53730 | R/H               | cGc/cAc      |
| 1          | 20512340              | G                  | A               | AT1G54990 | W/*               | tGg/tAg      |
| 1          | 20661588              | G                  | A               | AT1G55350 | P/L               | cCa/cTa      |
| 1          | 21405591              | G                  | A               | AT1G57790 | L/F               | Ctt/Ttt      |
| 1          | 21875436              | G                  | A               | AT1G59540 | G/E               | gGa/gAa      |

|   |          |   |   |           |     |         |
|---|----------|---|---|-----------|-----|---------|
| 1 | 22066012 | G | A | AT1G59940 | S/L | tCg/tTg |
| 1 | 22428699 | G | A | AT1G60913 | P/L | cCc/cTc |
| 1 | 23882511 | G | A | AT1G64350 | E/K | Gag/Aag |
| 1 | 25147642 | G | A | AT1G67220 | A/T | Gcg/Acg |
| 1 | 25539907 | G | A | AT1G68140 | P/S | Cct/Tct |
| 1 | 25868125 | G | A | AT1G68820 | E/K | Gaa/Aaa |
| 1 | 26361358 | G | A | AT1G69990 | A/V | gCt/gTt |
| 1 | 26558750 | G | A | AT1G70460 | G/E | gGg/gAg |
| 1 | 27345276 | G | A | AT1G72630 | E/K | Gaa/Aaa |
| 1 | 27413235 | G | A | AT1G72840 | T/M | aCg/aTg |
| 1 | 27916739 | G | A | AT1G74230 | G/D | gGc/gAc |
| 1 | 28208461 | G | A | AT1G75150 | P/S | Cct/Tct |
| 1 | 29682303 | G | A | AT1G78940 | T/I | aCc/aTc |
| 1 | 30090745 | G | A | AT1G79990 | A/T | Gca/Aca |
| 2 | 2426951  | G | A | AT2G06200 | G/E | gGa/gAa |
| 2 | 3623765  | G | A | AT2G08986 | V/M | Gtg/Atg |
| 2 | 7518468  | C | T | AT2G17290 | A/V | gCt/gTt |
| 2 | 7607536  | C | T | AT2G17500 | L/F | Ctt/Ttt |
| 2 | 7748009  | C | T | AT2G17820 | R/Q | cGa/cAa |
| 2 | 7819170  | C | T | AT2G17970 | W/* | tgG/tgA |
| 2 | 7892943  | C | T | AT2G18150 | R/K | aGa/aAa |
| 2 | 7999983  | C | T | AT2G18450 | D/N | Gat/Aat |
| 2 | 8009749  | C | T | AT2G18480 | A/T | Gcc/Acc |
| 2 | 8076473  | C | T | AT2G18610 | G/R | Ggg/Agg |
| 2 | 8408865  | C | T | AT2G19410 | D/N | Gat/Aat |
| 2 | 8508595  | C | T | AT2G19710 | P/L | cCt/cTt |
| 2 | 8632519  | C | T | AT2G20000 | G/D | gGt/gAt |
| 2 | 8846325  | C | T | AT2G20550 | R/Q | cGa/cAa |
| 2 | 9117277  | C | T | AT2G21300 | E/K | Gaa/Aaa |
| 2 | 10137070 | C | T | AT2G23810 | V/I | Gtt/Att |
| 2 | 10418528 | C | T | AT2G24520 | P/S | Cca/Tca |
| 2 | 11202418 | C | T | AT2G26310 | P/S | Cct/Tct |
| 2 | 11670172 | C | T | AT2G27260 | A/V | gCt/gTt |
| 2 | 11804031 | C | T | AT2G27680 | D/N | Gat/Aat |
| 2 | 13016895 | C | T | AT2G30550 | R/W | Cgg/Tgg |
| 2 | 13272020 | C | T | AT2G31141 | E/K | Gaa/Aaa |
| 2 | 13474785 | C | T | AT2G31680 | G/D | gGt/gAt |
| 2 | 13945640 | C | T | AT2G32870 | W/* | tgG/tgA |
| 2 | 15025390 | C | T | AT2G35738 | L/F | Ctt/Ttt |
| 2 | 16045457 | C | T | AT2G38300 | G/R | Gga/Aga |
| 3 | 124806   | G | A | AT3G01330 | L/F | Ctt/Ttt |
| 3 | 725973   | G | A | AT3G03140 | R/Q | cGg/cAg |
| 3 | 1088180  | G | A | AT3G04140 | A/T | Gct/Act |

|   |          |   |   |           |     |         |
|---|----------|---|---|-----------|-----|---------|
| 3 | 2182741  | G | A | AT3G06920 | R/K | aGa/aAa |
| 3 | 2238539  | G | A | AT3G07070 | V/M | Gtg/Atg |
| 3 | 2687551  | G | A | AT3G08850 | R/W | Cgg/Tgg |
| 3 | 2757810  | G | A | AT3G09032 | T/I | aCt/aTt |
| 3 | 2874014  | G | A | AT3G09360 | E/K | Gag/Aag |
| 3 | 4164574  | G | A | AT3G13010 | P/S | Cca/Tca |
| 3 | 5044688  | G | A | AT3G14980 | L/F | Ctc/Ttc |
| 3 | 5287390  | G | A | AT3G15604 | T/M | aCg/aTg |
| 3 | 7913271  | G | A | AT3G22380 | D/N | Gat/Aat |
| 3 | 8055053  | G | A | AT3G22790 | R/C | Cgt/Tgt |
| 3 | 8346080  | G | A | AT3G23325 | R/K | aGa/aAa |
| 3 | 9007127  | G | A | AT3G24670 | S/L | tCg/tTg |
| 3 | 9264939  | G | A | AT3G25510 | P/S | Cca/Tca |
| 3 | 10424860 | G | A | AT3G28030 | D/N | Gat/Aat |
| 3 | 11597068 | G | A | AT3G29765 | P/S | Cca/Tca |
| 3 | 17921885 | G | A | AT3G48390 | A/T | Gct/Act |
| 3 | 17936902 | G | A | AT3G48430 | V/M | Gtg/Atg |
| 3 | 18923361 | G | A | AT3G50920 | S/F | tCt/tTt |
| 3 | 19070082 | G | A | AT3G51370 | S/N | aGt/aAt |
| 3 | 19159614 | G | A | AT3G51650 | V/I | Gtt/Att |
| 3 | 20448362 | G | A | AT3G55160 | L/F | Ctt/Ttt |
| 3 | 21426904 | G | A | AT3G57860 | G/S | Ggc/Agc |
| 3 | 21517030 | G | A | AT3G58110 | D/N | Gac/Aac |
| 3 | 22149325 | G | A | AT3G59960 | G/S | Ggt/Agt |
| 3 | 22445157 | G | A | AT3G60730 | G/E | gGg/gAg |
| 3 | 23030506 | G | A | AT3G62220 | R/C | Cgt/Tgt |
| 3 | 23433011 | G | A | AT3G63460 | L/F | Ctc/Ttc |
| 4 | 2675681  | G | A | AT4G05190 | D/N | Gat/Aat |
| 4 | 2807348  | G | A | AT4G05520 | G/R | Gga/Aga |
| 4 | 6870005  | G | A | AT4G11290 | G/R | Gga/Aga |
| 4 | 6998720  | G | A | AT4G11550 | T/I | aCc/aTc |
| 4 | 7987196  | G | A | AT4G13750 | E/K | Gaa/Aaa |
| 4 | 8025494  | G | A | AT4G13870 | L/F | Ctc/Ttc |
| 4 | 8172233  | G | A | AT4G14160 | W/* | tgG/tgA |
| 4 | 8172233  | G | A | AT4G14160 | A/T | Gct/Act |
| 4 | 8759449  | G | A | AT4G15340 | P/L | cCt/cTt |
| 4 | 9177893  | G | A | AT4G16210 | S/F | tCt/tTt |
| 4 | 10454957 | G | A | AT4G19110 | A/V | gCt/gTt |
| 4 | 11347534 | G | A | AT4G21326 | V/M | Gtg/Atg |
| 4 | 11392826 | G | A | AT4G21380 | P/S | Cct/Tct |
| 4 | 11455610 | G | A | AT4G21530 | E/K | Gag/Aag |
| 5 | 569994   | G | A | AT5G02540 | D/N | Gat/Aat |
| 5 | 1622198  | G | A | AT5G05470 | S/N | aGc/aAc |

|   |          |   |   |           |     |         |
|---|----------|---|---|-----------|-----|---------|
| 5 | 1716162  | G | A | AT5G05710 | V/I | Gtc/Atc |
| 5 | 2680964  | G | A | AT5G08330 | R/H | cGt/cAt |
| 5 | 2787213  | G | A | AT5G08600 | E/K | Gag/Aag |
| 5 | 3328122  | G | A | AT5G10540 | A/T | Gct/Act |
| 5 | 3636793  | G | A | AT5G11400 | P/S | Cca/Tca |
| 5 | 4847383  | G | A | AT5G14970 | A/T | Gca/Aca |
| 5 | 4872733  | G | A | AT5G15050 | L/F | Ctc/Ttc |
| 5 | 5311884  | G | A | AT5G16260 | W/* | tgG/tgA |
| 5 | 8600423  | G | A | AT5G24960 | A/V | gCa/gTa |
| 5 | 8649053  | G | A | AT5G25100 | A/V | gCc/gTc |
| 5 | 9460685  | G | A | AT5G26890 | W/* | tGg/tAg |
| 5 | 10880071 | G | A | AT5G28850 | P/S | Cct/Tct |
| 5 | 12264824 | G | A | AT5G32613 | C/Y | tGc/tAc |
| 5 | 14029924 | G | A | AT5G35910 | R/W | Cgg/Tgg |
| 5 | 14854345 | G | A | AT5G37450 | P/S | Cct/Tct |
| 5 | 15285471 | G | A | AT5G38260 | P/S | Cca/Tca |
| 5 | 20049111 | G | A | AT5G49440 | R/K | aGa/aAa |
| 5 | 20425018 | G | A | AT5G50170 | G/E | gGa/gAa |

<sup>1</sup>Basepair location on chromosome 2 in TAIR v10

**Table S2 Genotyping markers used to positionally clone AR241 and AR211.**

| Positional markers for AR241 mutations |                      |          |          |                                                                |
|----------------------------------------|----------------------|----------|----------|----------------------------------------------------------------|
| Gene                                   | Enzyme               | Wt       | AR241    | Oligonucleotides <sup>a</sup>                                  |
| <i>At1g54990</i>                       | <i>MfeI</i>          | 235, 30  | 265      | ATGATTCAGCTTTAGGGTTAGCTTCAATT<br>AGCAACAACAGCTTCTCTCC          |
| <i>At2g17500</i>                       | <i>EcoRI</i>         | 239, 29  | 268      | CATGGGACTTACATTTCTAATCGGAGGAATT<br>TCCTCATCGCAGATTGCTG         |
| <i>At3g08850</i>                       | <i>HinfI</i>         | 152, 153 | 305      | TGATGTTTCGGTCACTGAAC<br>CGAAATTCTTCAAACCCGAACC                 |
| <i>At4g19110</i>                       | <i>BsmI</i>          | 331, 28  | 359      | GTCACCTCGTAGTAGTGTATCCGAGAATG<br>ATTGACGAGGCAAAGACGC           |
| <i>At5G08330</i>                       | <i>NdeI</i>          | 267      | 130, 137 | ACAACGACGGAGCAGTGAG<br>AGTAGTGCCAGTTCCAGTGG                    |
| <i>At5g28850</i>                       | <i>HinfI</i>         | 242      | 148, 94  | GCATCGGGTCTAATTCTGCC<br>AGAAATCAGTGAGTAACTCCATTCC              |
| Positional markers for AR211 mutations |                      |          |          |                                                                |
| Gene                                   | Enzyme               | Wt       | AR211    | Oligonucleotides <sup>a</sup>                                  |
| <i>At1g10940</i>                       | <i>BspHI</i>         | 211      | 178, 33  | AGTTGCCAGGCTCATGAAG<br>GTTAAACACCCAATCAGCTAACG                 |
| <i>At1g29540</i>                       | <i>HinfI</i>         | 130, 151 | 281      | CCTAAGGCACAGCAACAC<br>GGAAGAAGAGGAAGAATGAAGCC                  |
| <i>At1g58250</i>                       | <i>BglII</i>         | 211, 30  | 241      | TTAAAGATGTTGAAGCATCTCGAATGAGAT<br>GATGTTCTTCTCAACTCCTGAGC      |
| <i>At1g70950</i>                       | <i>MseI</i>          | 229      | 200, 29  | AGAGTCAATGTGAGTTTGATGAGGAAATT<br>TGTTTCATCGAGTTTCGATCCC        |
| <i>At2g24850</i>                       | <i>FokI</i>          | 159, 174 | 333      | GGTCGCGGAGATGGCTAG<br>ATTGCTTGAACCTGTTGGTG                     |
| <i>At2g44760</i>                       | <i>MseI</i>          | 290      | 225, 65  | GAAATGGCGGAGAAGGATAAGC<br>TCCTACACCTTTCCAAATCCC                |
| <i>At3g01300</i>                       | <i>DdeI</i>          | 262      | 138, 124 | CTACAACCTAGCAATGCAGAAAGC<br>TGACCCTGAAGGCCATCAG                |
| <i>At3g03405</i>                       | <i>HinfI</i>         | 130, 166 | 296      | GGAGAATCTATCTACACAACTGTTGG<br>CATATTGCATGAGATGGGAGAAACC        |
| <i>At3g16880</i>                       | <i>AccI</i>          | 282      | 166, 116 | CAGTAACCTAGAGATGTGGTTTGG<br>AGAATTTCTTTTACAGAGACATCC           |
| <i>At3g21430</i>                       | <i>FokI</i>          | 200, 30  | 230      | TAGTGCCGTGAAAAGCAGCAAAAAGGAT<br>GAGACTAGAACACACCTGCAG          |
| <i>At3g49060</i>                       | $\alpha$ <i>TaqI</i> | 241, 30  | 211      | CACTGAGAAGACTGGTTAAAGGAGAGATCCG<br>CCATATACATAAGATCCTTTACCCGAC |
| <i>At3g56600</i>                       | <i>HaeIII</i>        | 177.96   | 273      | TCTAACGGAGTTGGAGCTGC<br>AAGACTAAGCCCTGCAGCAG                   |
| <i>At4g01670</i>                       | <i>AccI</i>          | 352, 30  | 382      | TGAGCTTGAACCGGGTCGGGTTTCGTATA<br>GCCCATATTTAATCCCCACC          |
| <i>At4g09870</i>                       | <i>HinfI</i>         | 234      | 204, 30  | GGAAATCGTATGCCTTTCCC<br>CGACAAAAAACTTAGTCCAGGGCAAGAA           |
| <i>At4g12120</i>                       | <i>MfeI</i>          | 150, 171 | 321      | TGCAGATGTATGTCGTGCC<br>GCTCACTGACTGAGGCAAAG                    |
| <i>At4g13370</i>                       | <i>AluI</i>          | 250      | 165, 85  | CGCTTGAATTCGCTACTCC<br>GAGCAAGCGCTTGTCTCAC                     |
| <i>At4g24800</i>                       | <i>XhoI</i>          | 221, 30  | 251      | GACATTTTGAATGAATATGTGGAGACTCGA<br>CAAGAGCAAGATCATCAAGGC        |
| <i>At5g15730</i>                       | <i>HinfI</i>         | 321      | 191, 130 | TGGAACAACCACACCAAGATC                                          |

|                  |         |          |         |                                                                                           |
|------------------|---------|----------|---------|-------------------------------------------------------------------------------------------|
| <i>At5g26990</i> | HaeIII  | 187, 30  | 217     | GGGAAATGAGTGGATCTGTACAC<br>GAGAGAGTTTCCTGATGGAAATTTTCAG <u>G</u><br>TGGAAGCATACCTTTTCAGGC |
| <i>At5g40360</i> | BspHI   | 300      | 270, 30 | ATAAATATTCGTAGGTTGTTGGTGAGAAT <u>C</u><br>GTTGCCAACTATCTTGTGGACTTC                        |
| <i>At5g46040</i> | Hpy188I | 230, 30  | 260     | ACCCATAAATGGAGGCTCTGTACTATC <u>TCA</u><br>GCATTGAGAATGTTGTGAAGCC                          |
| <i>At5g53120</i> | Hpy188I | 82, 185  | 267     | GACGACAGTACTCATTCTCTTCC<br>TTCTCGTTCTAGACGACGAGG                                          |
| <i>At5g56450</i> | Hpy188I | 300      | 270, 30 | ATGATGAAGTGAAGAGGTTCTTGAATT <u>CGG</u><br>TTGAGCTTAGACCAATCCATGTC                         |
| <i>At5g57090</i> | AcI     | 217, 230 | 247     | TCCTCAAGGAATCGTTCCTTTTGT <u>TCG</u><br>TTACAGGCAAAGCAACCAGC                               |
| <i>At5g66140</i> | BglII   | 230      | 200, 30 | TACCCAAAGTGGTGGTGTGAGACC <u>TTAG</u><br>CAGAGCACGGATAGCGAG                                |

<sup>a</sup>Underlined nucleotide is the introduced mutation for this dCAPS genotyping marker (MICHAELS AND AMASINO 1998; NEFF *et al.* 1998).

**Table S3 Homozygous EMS-related mutations in the AR211 Exome**

| Chromosome | Location <sup>1</sup> | Reference sequence | Mutant sequence | Gene      | Amino acid change | Codon change |
|------------|-----------------------|--------------------|-----------------|-----------|-------------------|--------------|
| 1          | 139060                | C                  | T               | AT1G01355 | P/S               | Cct/Tct      |
| 1          | 561276                | C                  | T               | AT1G02630 | A/T               | Gct/Act      |
| 1          | 723055                | C                  | T               | AT1G03060 | A/T               | Gcg/Acg      |
| 1          | 734475                | C                  | T               | AT1G03080 | D/N               | Gat/Aat      |
| 1          | 960025                | C                  | T               | AT1G03820 | E/K               | Gaa/Aaa      |
| 1          | 1186179               | C                  | T               | AT1G04400 | G/D               | gGt/gAt      |
| 1          | 1411381               | C                  | T               | AT1G04970 | L/F               | Ctc/Ttc      |
| 1          | 1913814               | C                  | T               | AT1G06250 | G/E               | gGa/gAa      |
| 1          | 3658079               | G                  | A               | AT1G10940 | A/V               | gCc/gTc      |
| 1          | 4732699               | G                  | A               | AT1G13800 | R/C               | Cgc/Tgc      |
| 1          | 5390306               | G                  | A               | AT1G15670 | R/Q               | cGg/cAg      |
| 1          | 5677353               | G                  | A               | AT1G16610 | L/F               | Ctt/Ttt      |
| 1          | 5809513               | G                  | A               | AT1G16980 | S/N               | aGt/aAt      |
| 1          | 6313539               | G                  | A               | AT1G18340 | L/F               | Ctt/Ttt      |
| 1          | 6362408               | G                  | A               | AT1G18480 | G/E               | gGg/gAg      |
| 1          | 7101970               | G                  | A               | AT1G20500 | P/L               | cCa/cTa      |
| 1          | 7650632               | G                  | A               | AT1G21760 | R/H               | cGc/cAc      |
| 1          | 8223327               | G                  | A               | AT1G23190 | R/H               | cGt/cAt      |
| 1          | 9118563               | G                  | A               | AT1G26355 | L/F               | Ctt/Ttt      |
| 1          | 9183098               | G                  | A               | AT1G26570 | A/T               | Gct/Act      |
| 1          | 10030338              | G                  | A               | AT1G28520 | E/K               | Gaa/Aaa      |
| 1          | 10327509              | G                  | A               | AT1G29540 | R/K               | aGa/aAa      |
| 1          | 11146522              | G                  | A               | AT1G31190 | A/T               | Gct/Act      |
| 1          | 11858257              | G                  | A               | AT1G32760 | G/S               | Ggt/AgT      |
| 1          | 12379443              | G                  | A               | AT1G34042 | S/F               | tCc/tTc      |
| 1          | 12745064              | G                  | A               | AT1G34760 | L/F               | Ctt/Ttt      |
| 1          | 16277445              | G                  | A               | AT1G43190 | R/C               | Cgt/Tgt      |
| 1          | 17320715              | G                  | A               | AT1G47250 | D/N               | Gat/Aat      |
| 1          | 18105816              | G                  | A               | AT1G48940 | L/F               | Ctt/Ttt      |
| 1          | 18220800              | G                  | A               | AT1G49250 | G/D               | gGc/gAc      |
| 1          | 18679322              | G                  | A               | AT1G50420 | L/F               | Ctt/Ttt      |
| 1          | 19113399              | G                  | A               | AT1G51538 | E/K               | Gaa/Aaa      |
| 1          | 19778471              | G                  | A               | AT1G53070 | G/D               | gGc/gAc      |
| 1          | 19795263              | G                  | A               | AT1G53130 | S/F               | tCc/tTc      |
| 1          | 20080338              | G                  | A               | AT1G53790 | P/S               | Ccg/Tcg      |
| 1          | 20222720              | G                  | A               | AT1G54170 | S/L               | tCa/tTa      |
| 1          | 20865721              | G                  | A               | AT1G55820 | D/N               | Gat/Aat      |
| 1          | 21029118              | G                  | A               | AT1G56190 | G/S               | Ggt/AgT      |
| 1          | 21588781              | G                  | A               | AT1G58250 | S/F               | tCt/tTt      |
| 1          | 21594500              | G                  | A               | AT1G58250 | P/S               | Cca/Tca      |
| 1          | 21762177              | G                  | A               | AT1G58602 | R/K               | aGa/aAa      |
| 1          | 22144577              | G                  | A               | AT1G60070 | S/F               | tCt/tTt      |
| 1          | 23117273              | G                  | A               | AT1G62450 | P/L               | cCg/cTg      |
| 1          | 23936314              | G                  | A               | AT1G64430 | R/K               | aGa/aAa      |
| 1          | 24287328              | G                  | A               | AT1G65380 | S/N               | aGt/aAt      |
| 1          | 24461387              | G                  | A               | AT1G65770 | H/Y               | Cat/Tat      |
| 1          | 24930277              | G                  | A               | AT1G66820 | G/E               | gGa/gAa      |
| 1          | 24943705              | G                  | A               | AT1G66860 | A/T               | Gct/Act      |
| 1          | 25711879              | G                  | A               | AT1G68526 | P/L               | cCg/cTg      |
| 1          | 25904516              | G                  | A               | AT1G68890 | A/T               | Gca/Aca      |



|   |          |   |   |           |     |          |
|---|----------|---|---|-----------|-----|----------|
| 1 | 25923434 | G | A | AT1G68940 | L/F | Ctt/Ttt  |
| 1 | 26753628 | G | A | AT1G70950 | D/N | Gat/Aat  |
| 1 | 26755012 | G | A | AT1G70950 | E/K | Gag/Aag  |
| 1 | 26815470 | G | A | AT1G71100 | A/T | Gcg/Acg  |
| 1 | 27198112 | G | A | AT1G72250 | W/* | tgG/tgA  |
| 1 | 28031987 | G | A | AT1G74630 | W/* | tgG/tgA  |
| 1 | 28114701 | G | A | AT1G74830 | L/F | Ctt/Ttt  |
| 1 | 29456040 | G | A | AT1G78280 | A/T | Gct/Act  |
| 1 | 29972916 | G | A | AT1G79650 | L/F | Ctt/Ttt  |
| 2 | 9529495  | C | T | AT2G22440 | L/F | Ctc/Ttc  |
| 2 | 10584074 | C | T | AT2G24850 | G/R | Gga/Aga  |
| 2 | 11627352 | C | T | AT2G27200 | P/L | cCc/cTc  |
| 2 | 11815196 | C | T | AT2G27700 | M/I | atG/atA  |
| 2 | 13004796 | C | T | AT2G30520 | D/N | Gac/Aac  |
| 2 | 13347629 | C | T | AT2G31300 | G/S | Ggt/Aggt |
| 2 | 13604529 | C | T | AT2G31970 | S/F | tCc/tTc  |
| 2 | 14229078 | C | T | AT2G33610 | P/L | cCc/cTc  |
| 2 | 14267486 | C | T | AT2G33730 | R/K | aGa/aAa  |
| 2 | 14428394 | C | T | AT2G34170 | L/F | Ctc/Ttc  |
| 2 | 15174068 | C | T | AT2G36180 | G/D | gGt/gAt  |
| 2 | 15335766 | C | T | AT2G36570 | P/S | Cca/Tca  |
| 2 | 15405954 | C | T | AT2G36730 | G/D | gGt/gAt  |
| 2 | 17729309 | C | T | AT2G42580 | S/F | tCt/tTt  |
| 2 | 18047784 | C | T | AT2G43465 | G/E | gGa/gAa  |
| 2 | 18454443 | C | T | AT2G44760 | G/S | Ggt/Aggt |
| 2 | 18665617 | C | T | AT2G45260 | A/T | Gct/Act  |
| 2 | 18738519 | C | T | AT2G45460 | R/Q | cGa/cAa  |
| 2 | 19401957 | C | T | AT2G47250 | G/R | Gga/Aga  |
| 2 | 19478628 | C | T | AT2G47460 | R/C | Cgt/Tgt  |
| 3 | 92622    | C | T | AT3G01300 | G/R | Gga/Aga  |
| 3 | 331987   | C | T | AT3G01990 | S/F | tCt/tTt  |
| 3 | 625634   | C | T | AT3G02860 | V/I | Gtt/Att  |
| 3 | 792554   | C | T | AT3G03350 | L/F | Ctt/Ttt  |
| 3 | 809888   | C | T | AT3G03405 | R/Q | cGa/cAa  |
| 3 | 1497902  | C | T | AT3G05260 | A/T | Gcg/Acg  |
| 3 | 1532686  | C | T | AT3G05360 | S/N | aGc/aAc  |
| 3 | 1721097  | C | T | AT3G05790 | A/T | Gcg/Acg  |
| 3 | 2783357  | C | T | AT3G09090 | E/K | Gag/Aag  |
| 3 | 3835399  | C | T | AT3G12040 | A/T | Gca/Aca  |
| 3 | 4252189  | C | T | AT3G13222 | E/K | Gaa/Aaa  |
| 3 | 5097716  | C | T | AT3G15130 | E/K | Gaa/Aaa  |
| 3 | 5462454  | C | T | AT3G16110 | E/K | Gag/Aag  |
| 3 | 5723741  | C | T | AT3G16810 | A/T | Gcg/Acg  |
| 3 | 5767183  | C | T | AT3G16880 | R/C | Cgc/Tgc  |
| 3 | 6112950  | C | T | AT3G17850 | D/N | Gat/Aat  |
| 3 | 6193177  | C | T | AT3G18080 | L/F | Ctt/Ttt  |
| 3 | 6276323  | C | T | AT3G18290 | S/F | tCt/tTt  |
| 3 | 6384180  | C | T | AT3G18550 | P/S | Cca/Tca  |
| 3 | 7550168  | C | T | AT3G21430 | R/K | aGa/aAa  |
| 3 | 8179479  | C | T | AT3G23020 | G/R | Ggg/Agg  |
| 3 | 8617009  | C | T | AT3G23860 | V/I | Gtt/Att  |
| 3 | 8806375  | C | T | AT3G24300 | G/E | gGg/gAg  |
| 3 | 9661903  | C | T | AT3G26380 | P/S | Cct/Tct  |
| 3 | 9792146  | C | T | AT3G26630 | G/E | gGa/gAa  |

|   |          |   |   |           |     |          |
|---|----------|---|---|-----------|-----|----------|
| 3 | 9915941  | C | T | AT3G26910 | A/T | Gca/Aca  |
| 3 | 10985368 | C | T | AT3G28960 | G/S | Ggt/Aggt |
| 3 | 11729342 | C | T | AT3G29810 | T/I | aCt/aTt  |
| 3 | 18188669 | C | T | AT3G49060 | G/E | gGa/gAa  |
| 3 | 18528294 | C | T | AT3G49970 | A/T | Gca/Aca  |
| 3 | 18694933 | C | T | AT3G50380 | D/N | Gat/Aat  |
| 3 | 19895848 | C | T | AT3G53680 | A/T | Gca/Aca  |
| 3 | 20706123 | C | T | AT3G55780 | S/F | tCt/tTt  |
| 3 | 20969987 | C | T | AT3G56600 | P/S | Cct/Tct  |
| 4 | 37193    | G | A | AT4G00100 | G/R | Gga/Agga |
| 4 | 203800   | G | A | AT4G00450 | G/E | gGg/gAg  |
| 4 | 269723   | G | A | AT4G00650 | G/E | gGg/gAg  |
| 4 | 419631   | G | A | AT4G00970 | D/N | Gat/Aat  |
| 4 | 711931   | G | A | AT4G01670 | S/F | tCc/tTc  |
| 4 | 894797   | G | A | AT4G02030 | E/K | Gag/Aag  |
| 4 | 6200956  | G | A | AT4G09870 | G/D | gGt/gAt  |
| 4 | 6299728  | G | A | AT4G10070 | T/M | aCg/aTg  |
| 4 | 6416798  | G | A | AT4G10350 | P/L | cCt/cTt  |
| 4 | 6783448  | G | A | AT4G11130 | D/N | Gac/Aac  |
| 4 | 6988567  | G | A | AT4G11530 | R/K | aGg/aAg  |
| 4 | 7258522  | G | A | AT4G12120 | Q/* | Caa/Taa  |
| 4 | 7315373  | G | A | AT4G12320 | L/F | Ctt/Ttt  |
| 4 | 7409891  | G | A | AT4G12490 | S/F | tCt/tTt  |
| 4 | 7614091  | G | A | AT4G13040 | E/K | Gaa/Aaa  |
| 4 | 7779985  | G | A | AT4G13370 | P/L | cCg/cTg  |
| 4 | 9052848  | G | A | AT4G15975 | G/E | gGa/gAa  |
| 4 | 9067901  | G | A | AT4G16008 | E/K | Gaa/Aaa  |
| 4 | 9810849  | G | A | AT4G17610 | P/S | Cca/Tca  |
| 4 | 9923398  | G | A | AT4G17850 | D/N | Gat/Aat  |
| 4 | 9942510  | G | A | AT4G17895 | E/K | Gaa/Aaa  |
| 4 | 10373483 | G | A | AT4G18940 | D/N | Gac/Aac  |
| 4 | 10746919 | G | A | AT4G19750 | T/I | aCc/aTc  |
| 4 | 10988610 | G | A | AT4G20350 | R/K | aGa/aAa  |
| 4 | 11157007 | G | A | AT4G20830 | G/R | Gga/Agga |
| 4 | 11577582 | G | A | AT4G21820 | A/T | Gct/Act  |
| 4 | 12700257 | G | A | AT4G24600 | V/M | Gtg/Atg  |
| 4 | 12783682 | G | A | AT4G24800 | E/K | Gag/Aag  |
| 4 | 13302839 | G | A | AT4G26270 | S/F | tCt/tTt  |
| 4 | 13922668 | G | A | AT4G27980 | S/N | aGc/aAc  |
| 4 | 15434283 | G | A | AT4G31900 | A/T | Gca/Aca  |
| 4 | 15445308 | G | A | AT4G31920 | S/F | tCt/tTt  |
| 4 | 16918583 | G | A | AT4G35680 | A/T | Gca/Aca  |
| 4 | 17942085 | G | A | AT4G38280 | D/N | Gat/Aat  |
| 5 | 429342   | G | A | AT5G02170 | G/R | Gga/Agga |
| 5 | 1068539  | G | A | AT5G03960 | P/S | Ccg/Tcg  |
| 5 | 1209773  | G | A | AT5G04320 | E/K | Gag/Aag  |
| 5 | 1372241  | G | A | AT5G04750 | A/T | Gct/Act  |
| 5 | 1941097  | G | A | AT5G06350 | R/H | cGt/cAt  |
| 5 | 2127579  | G | A | AT5G06850 | S/F | tCt/tTt  |
| 5 | 2344427  | G | A | AT5G07400 | R/K | aGa/aAa  |
| 5 | 2350767  | G | A | AT5G07420 | A/T | Gcg/Actg |
| 5 | 2411992  | G | A | AT5G07630 | R/Q | cGg/cAg  |
| 5 | 2744997  | G | A | AT5G08480 | G/D | gGc/gAc  |
| 5 | 2883284  | G | A | AT5G09290 | E/K | Gag/Aag  |

|   |          |   |   |           |     |         |
|---|----------|---|---|-----------|-----|---------|
| 5 | 3026507  | G | A | AT5G09750 | P/L | cCg/cTg |
| 5 | 3551582  | G | A | AT5G11160 | G/D | gGc/gAc |
| 5 | 3784369  | G | A | AT5G11740 | V/I | Gtc/Atc |
| 5 | 3805942  | G | A | AT5G11800 | A/V | gCt/gTt |
| 5 | 3863428  | G | A | AT5G11970 | T/M | aCg/aTg |
| 5 | 3937794  | G | A | AT5G12180 | G/E | gGg/gAg |
| 5 | 4756942  | G | A | AT5G14730 | D/N | Gat/Aat |
| 5 | 4959462  | G | A | AT5G15270 | G/E | gGa/gAa |
| 5 | 5131730  | G | A | AT5G15730 | G/E | gGa/gAa |
| 5 | 5253530  | G | A | AT5G16080 | S/F | tCc/tTc |
| 5 | 5872278  | G | A | AT5G17790 | P/S | Cca/Tca |
| 5 | 6136517  | G | A | AT5G18490 | S/F | tCc/tTc |
| 5 | 6447214  | G | A | AT5G19170 | G/D | gGc/gAc |
| 5 | 6687316  | G | A | AT5G19780 | M/I | atG/atA |
| 5 | 6716199  | G | A | AT5G19870 | L/F | Ctt/Ttt |
| 5 | 7376608  | G | A | AT5G22290 | A/V | gCc/gTc |
| 5 | 7918346  | G | A | AT5G23480 | D/N | Gat/Aat |
| 5 | 8052616  | G | A | AT5G23880 | V/I | Gtc/Atc |
| 5 | 9493106  | G | A | AT5G26990 | S/N | aGc/aAc |
| 5 | 9571457  | G | A | AT5G27200 | A/T | Gct/Act |
| 5 | 9822363  | G | A | AT5G27730 | G/D | gGt/gAt |
| 5 | 10780921 | G | A | AT5G28740 | E/K | Gag/Aag |
| 5 | 14720407 | G | A | AT5G37180 | G/S | Ggt/Agt |
| 5 | 15281640 | G | A | AT5G38250 | A/V | gCt/gTt |
| 5 | 16145916 | G | A | AT5G40360 | V/M | Gtg/Atg |
| 5 | 16853788 | G | A | AT5G42180 | D/N | Gat/Aat |
| 5 | 18672194 | C | T | AT5G46040 | E/K | Gaa/Aaa |
| 5 | 18931148 | C | T | AT5G46650 | R/W | Cgg/Tgg |
| 5 | 21182641 | C | T | AT5G52130 | E/K | Gag/Aag |
| 5 | 22858782 | C | T | AT5G56450 | G/E | gGa/gAa |
| 5 | 23097145 | C | T | AT5G57070 | P/S | Cct/Tct |
| 5 | 23104210 | C | T | AT5G57090 | A/V | gCc/gTc |
| 5 | 24115961 | C | T | AT5G59870 | A/T | Gcc/Acc |
| 5 | 25166804 | C | T | AT5G62680 | G/E | gGg/gAg |
| 5 | 25685612 | C | T | AT5G64210 | R/K | aGa/aAa |
| 5 | 26052558 | C | T | AT5G65207 | E/K | Gag/Aag |
| 5 | 26437907 | C | T | AT5G66140 | G/D | gGt/gAt |

<sup>1</sup>Basepair location on chromosome 2 in TAIR v10
