# Supplementary material for: Abscisic Acid Regulates Root Elongation Through the Activities of Auxin and Ethylene in Arabidopsis thaliana
Source: PubMed Central journal article supplement (PMC4455775; doi:10.1534/g3.114.011080), 2014-05-15
Supplement: supp_g3.114.011080_TableS1.pdf [file supp_g3.114.011080_TableS1.pdf]

**Table S1 Homozygous EMS-related mutations in the AR241 Exome**

| Chromosome | Location <sup>1</sup> | Reference sequence | Mutant sequence | Gene      | Amino acid change | Codon change |
|------------|-----------------------|--------------------|-----------------|-----------|-------------------|--------------|
| 1          | 570351                | G                  | A               | AT1G02650 | C/Y               | tGt/tAt      |
| 1          | 776720                | G                  | A               | AT1G03190 | G/E               | gGa/gAa      |
| 1          | 792780                | G                  | A               | AT1G03240 | A/V               | gCg/gTg      |
| 1          | 1317235               | G                  | A               | AT1G04700 | R/Q               | cGg/cAg      |
| 1          | 1470175               | G                  | A               | AT1G05100 | G/E               | gGa/gAa      |
| 1          | 1751949               | G                  | A               | AT1G05820 | V/I               | Gtt/Att      |
| 1          | 2385274               | G                  | A               | AT1G07705 | E/K               | Gaa/Aaa      |
| 1          | 2812322               | G                  | A               | AT1G08790 | D/N               | Gac/Aac      |
| 1          | 2927915               | G                  | A               | AT1G09070 | G/D               | gGc/gAc      |
| 1          | 3033900               | G                  | A               | AT1G09400 | P/S               | Cct/Tct      |
| 1          | 3266046               | G                  | A               | AT1G10010 | G/D               | gGt/gAt      |
| 1          | 3367220               | G                  | A               | AT1G10280 | R/C               | Cgc/Tgc      |
| 1          | 3691108               | G                  | A               | AT1G11070 | P/L               | cCg/cTg      |
| 1          | 3818161               | G                  | A               | AT1G11350 | S/L               | tCa/tTa      |
| 1          | 4014976               | G                  | A               | AT1G11905 | A/T               | Gct/Act      |
| 1          | 4173407               | G                  | A               | AT1G12270 | G/S               | Ggt/Agt      |
| 1          | 4956980               | G                  | A               | AT1G14480 | A/T               | Gca/Aca      |
| 1          | 5427361               | G                  | A               | AT1G15770 | P/S               | Cct/Tct      |
| 1          | 5639610               | G                  | A               | AT1G16500 | S/N               | aGc/aAc      |
| 1          | 6099926               | G                  | A               | AT1G17730 | E/K               | Gaa/Aaa      |
| 1          | 6590873               | G                  | A               | AT1G19090 | G/E               | gGg/gAg      |
| 1          | 6969768               | G                  | A               | AT1G20100 | P/L               | cCg/cTg      |
| 1          | 7488007               | G                  | A               | AT1G21380 | A/V               | gCt/gTt      |
| 1          | 8065783               | G                  | A               | AT1G22770 | C/Y               | tGt/tAt      |
| 1          | 8241286               | G                  | A               | AT1G23210 | E/K               | Gag/Aag      |
| 1          | 10104331              | G                  | A               | AT1G28760 | G/R               | Gga/Aga      |
| 1          | 10217836              | G                  | A               | AT1G29240 | P/S               | Cca/Tca      |
| 1          | 12088324              | G                  | A               | AT1G33340 | D/N               | Gat/Aat      |
| 1          | 12163493              | G                  | A               | AT1G33540 | R/*               | Cga/Tga      |
| 1          | 12463233              | G                  | A               | AT1G34220 | Q/*               | Caa/Taa      |
| 1          | 13026656              | G                  | A               | AT1G35420 | D/N               | Gat/Aat      |
| 1          | 16654369              | G                  | A               | AT1G43900 | G/S               | Ggt/Agt      |
| 1          | 18018428              | G                  | A               | AT1G48720 | G/D               | gGt/gAt      |
| 1          | 18936189              | G                  | A               | AT1G51110 | G/E               | gGa/gAa      |
| 1          | 19059085              | G                  | A               | AT1G51405 | E/K               | Gaa/Aaa      |
| 1          | 20064561              | G                  | A               | AT1G53730 | R/H               | cGc/cAc      |
| 1          | 20512340              | G                  | A               | AT1G54990 | W/*               | tGg/tAg      |
| 1          | 20661588              | G                  | A               | AT1G55350 | P/L               | cCa/cTa      |
| 1          | 21405591              | G                  | A               | AT1G57790 | L/F               | Ctt/Ttt      |
| 1          | 21875436              | G                  | A               | AT1G59540 | G/E               | gGa/gAa      |

|   |          |   |   |           |     |         |
|---|----------|---|---|-----------|-----|---------|
| 1 | 22066012 | G | A | AT1G59940 | S/L | tCg/tTg |
| 1 | 22428699 | G | A | AT1G60913 | P/L | cCc/cTc |
| 1 | 23882511 | G | A | AT1G64350 | E/K | Gag/Aag |
| 1 | 25147642 | G | A | AT1G67220 | A/T | Gcg/Acg |
| 1 | 25539907 | G | A | AT1G68140 | P/S | Cct/Tct |
| 1 | 25868125 | G | A | AT1G68820 | E/K | Gaa/Aaa |
| 1 | 26361358 | G | A | AT1G69990 | A/V | gCt/gTt |
| 1 | 26558750 | G | A | AT1G70460 | G/E | gGg/gAg |
| 1 | 27345276 | G | A | AT1G72630 | E/K | Gaa/Aaa |
| 1 | 27413235 | G | A | AT1G72840 | T/M | aCg/aTg |
| 1 | 27916739 | G | A | AT1G74230 | G/D | gGc/gAc |
| 1 | 28208461 | G | A | AT1G75150 | P/S | Cct/Tct |
| 1 | 29682303 | G | A | AT1G78940 | T/I | aCc/aTc |
| 1 | 30090745 | G | A | AT1G79990 | A/T | Gca/Aca |
| 2 | 2426951  | G | A | AT2G06200 | G/E | gGa/gAa |
| 2 | 3623765  | G | A | AT2G08986 | V/M | Gtg/Atg |
| 2 | 7518468  | C | T | AT2G17290 | A/V | gCt/gTt |
| 2 | 7607536  | C | T | AT2G17500 | L/F | Ctt/Ttt |
| 2 | 7748009  | C | T | AT2G17820 | R/Q | cGa/cAa |
| 2 | 7819170  | C | T | AT2G17970 | W/* | tgG/tgA |
| 2 | 7892943  | C | T | AT2G18150 | R/K | aGa/aAa |
| 2 | 7999983  | C | T | AT2G18450 | D/N | Gat/Aat |
| 2 | 8009749  | C | T | AT2G18480 | A/T | Gcc/Acc |
| 2 | 8076473  | C | T | AT2G18610 | G/R | Ggg/Agg |
| 2 | 8408865  | C | T | AT2G19410 | D/N | Gat/Aat |
| 2 | 8508595  | C | T | AT2G19710 | P/L | cCt/cTt |
| 2 | 8632519  | C | T | AT2G20000 | G/D | gGt/gAt |
| 2 | 8846325  | C | T | AT2G20550 | R/Q | cGa/cAa |
| 2 | 9117277  | C | T | AT2G21300 | E/K | Gaa/Aaa |
| 2 | 10137070 | C | T | AT2G23810 | V/I | Gtt/Att |
| 2 | 10418528 | C | T | AT2G24520 | P/S | Cca/Tca |
| 2 | 11202418 | C | T | AT2G26310 | P/S | Cct/Tct |
| 2 | 11670172 | C | T | AT2G27260 | A/V | gCt/gTt |
| 2 | 11804031 | C | T | AT2G27680 | D/N | Gat/Aat |
| 2 | 13016895 | C | T | AT2G30550 | R/W | Cgg/Tgg |
| 2 | 13272020 | C | T | AT2G31141 | E/K | Gaa/Aaa |
| 2 | 13474785 | C | T | AT2G31680 | G/D | gGt/gAt |
| 2 | 13945640 | C | T | AT2G32870 | W/* | tgG/tgA |
| 2 | 15025390 | C | T | AT2G35738 | L/F | Ctt/Ttt |
| 2 | 16045457 | C | T | AT2G38300 | G/R | Gga/Aga |
| 3 | 124806   | G | A | AT3G01330 | L/F | Ctt/Ttt |
| 3 | 725973   | G | A | AT3G03140 | R/Q | cGg/cAg |
| 3 | 1088180  | G | A | AT3G04140 | A/T | Gct/Act |

|   |          |   |   |           |     |         |
|---|----------|---|---|-----------|-----|---------|
| 3 | 2182741  | G | A | AT3G06920 | R/K | aGa/aAa |
| 3 | 2238539  | G | A | AT3G07070 | V/M | Gtg/Atg |
| 3 | 2687551  | G | A | AT3G08850 | R/W | Cgg/Tgg |
| 3 | 2757810  | G | A | AT3G09032 | T/I | aCt/aTt |
| 3 | 2874014  | G | A | AT3G09360 | E/K | Gag/Aag |
| 3 | 4164574  | G | A | AT3G13010 | P/S | Cca/Tca |
| 3 | 5044688  | G | A | AT3G14980 | L/F | Ctc/Ttc |
| 3 | 5287390  | G | A | AT3G15604 | T/M | aCg/aTg |
| 3 | 7913271  | G | A | AT3G22380 | D/N | Gat/Aat |
| 3 | 8055053  | G | A | AT3G22790 | R/C | Cgt/Tgt |
| 3 | 8346080  | G | A | AT3G23325 | R/K | aGa/aAa |
| 3 | 9007127  | G | A | AT3G24670 | S/L | tCg/tTg |
| 3 | 9264939  | G | A | AT3G25510 | P/S | Cca/Tca |
| 3 | 10424860 | G | A | AT3G28030 | D/N | Gat/Aat |
| 3 | 11597068 | G | A | AT3G29765 | P/S | Cca/Tca |
| 3 | 17921885 | G | A | AT3G48390 | A/T | Gct/Act |
| 3 | 17936902 | G | A | AT3G48430 | V/M | Gtg/Atg |
| 3 | 18923361 | G | A | AT3G50920 | S/F | tCt/tTt |
| 3 | 19070082 | G | A | AT3G51370 | S/N | aGt/aAt |
| 3 | 19159614 | G | A | AT3G51650 | V/I | Gtt/Att |
| 3 | 20448362 | G | A | AT3G55160 | L/F | Ctt/Ttt |
| 3 | 21426904 | G | A | AT3G57860 | G/S | Ggc/Agc |
| 3 | 21517030 | G | A | AT3G58110 | D/N | Gac/Aac |
| 3 | 22149325 | G | A | AT3G59960 | G/S | Ggt/Agt |
| 3 | 22445157 | G | A | AT3G60730 | G/E | gGg/gAg |
| 3 | 23030506 | G | A | AT3G62220 | R/C | Cgt/Tgt |
| 3 | 23433011 | G | A | AT3G63460 | L/F | Ctc/Ttc |
| 4 | 2675681  | G | A | AT4G05190 | D/N | Gat/Aat |
| 4 | 2807348  | G | A | AT4G05520 | G/R | Gga/Aga |
| 4 | 6870005  | G | A | AT4G11290 | G/R | Gga/Aga |
| 4 | 6998720  | G | A | AT4G11550 | T/I | aCc/aTc |
| 4 | 7987196  | G | A | AT4G13750 | E/K | Gaa/Aaa |
| 4 | 8025494  | G | A | AT4G13870 | L/F | Ctc/Ttc |
| 4 | 8172233  | G | A | AT4G14160 | W/* | tgG/tgA |
| 4 | 8172233  | G | A | AT4G14160 | A/T | Gct/Act |
| 4 | 8759449  | G | A | AT4G15340 | P/L | cCt/cTt |
| 4 | 9177893  | G | A | AT4G16210 | S/F | tCt/tTt |
| 4 | 10454957 | G | A | AT4G19110 | A/V | gCt/gTt |
| 4 | 11347534 | G | A | AT4G21326 | V/M | Gtg/Atg |
| 4 | 11392826 | G | A | AT4G21380 | P/S | Cct/Tct |
| 4 | 11455610 | G | A | AT4G21530 | E/K | Gag/Aag |
| 5 | 569994   | G | A | AT5G02540 | D/N | Gat/Aat |
| 5 | 1622198  | G | A | AT5G05470 | S/N | aGc/aAc |

|   |          |   |   |           |     |         |
|---|----------|---|---|-----------|-----|---------|
| 5 | 1716162  | G | A | AT5G05710 | V/I | Gtc/Atc |
| 5 | 2680964  | G | A | AT5G08330 | R/H | cGt/cAt |
| 5 | 2787213  | G | A | AT5G08600 | E/K | Gag/Aag |
| 5 | 3328122  | G | A | AT5G10540 | A/T | Gct/Act |
| 5 | 3636793  | G | A | AT5G11400 | P/S | Cca/Tca |
| 5 | 4847383  | G | A | AT5G14970 | A/T | Gca/Aca |
| 5 | 4872733  | G | A | AT5G15050 | L/F | Ctc/Ttc |
| 5 | 5311884  | G | A | AT5G16260 | W/* | tgG/tgA |
| 5 | 8600423  | G | A | AT5G24960 | A/V | gCa/gTa |
| 5 | 8649053  | G | A | AT5G25100 | A/V | gCc/gTc |
| 5 | 9460685  | G | A | AT5G26890 | W/* | tGg/tAg |
| 5 | 10880071 | G | A | AT5G28850 | P/S | Cct/Tct |
| 5 | 12264824 | G | A | AT5G32613 | C/Y | tGc/tAc |
| 5 | 14029924 | G | A | AT5G35910 | R/W | Cgg/Tgg |
| 5 | 14854345 | G | A | AT5G37450 | P/S | Cct/Tct |
| 5 | 15285471 | G | A | AT5G38260 | P/S | Cca/Tca |
| 5 | 20049111 | G | A | AT5G49440 | R/K | aGa/aAa |
| 5 | 20425018 | G | A | AT5G50170 | G/E | gGa/gAa |

<sup>1</sup>Basepair location on chromosome 2 in TAIR v10
