# Supplementary material for: Abscisic Acid Regulates Root Elongation Through the Activities of Auxin and Ethylene in Arabidopsis thaliana
Source: PubMed Central journal article supplement (PMC4455775; doi:10.1534/g3.114.011080), 2014-05-15
Supplement: supp_g3.114.011080_TableS2.pdf [file supp_g3.114.011080_TableS2.pdf]

**Table S2 Genotyping markers used to positionally clone AR241 and AR211.**

| Positional markers for AR241 mutations |               |          |          |                                                                |
|----------------------------------------|---------------|----------|----------|----------------------------------------------------------------|
| Gene                                   | Enzyme        | Wt       | AR241    | Oligonucleotides <sup>a</sup>                                  |
| <i>At1g54990</i>                       | <i>MfeI</i>   | 235, 30  | 265      | ATGATTCAGCTTTAGGGTTAGCTTCAATT<br>AGCAACAACAGCTTCTCTCC          |
| <i>At2g17500</i>                       | <i>EcoRI</i>  | 239, 29  | 268      | CATGGGACTTACATTTCTAATCGGAGGAATT<br>TCCTCATCGCAGATTGCTG         |
| <i>At3g08850</i>                       | <i>HinfI</i>  | 152, 153 | 305      | TGATGTTTCGGTCACTGAAC<br>CGAAATTCTTCAAACCCGAACC                 |
| <i>At4g19110</i>                       | <i>BsmI</i>   | 331, 28  | 359      | GTCACCTCGTAGTAGTGTATCCGAGAATG<br>ATTGACGAGGCAAAGACGC           |
| <i>At5G08330</i>                       | <i>NdeI</i>   | 267      | 130, 137 | ACAACGACGGAGCAGTGAG<br>AGTAGTGCCAGTTCCAGTGG                    |
| <i>At5g28850</i>                       | <i>HinfI</i>  | 242      | 148, 94  | GCATCGGGTCTAATTCTGCC<br>AGAAATCAGTGAGTAACTCCATTCC              |
| Positional markers for AR211 mutations |               |          |          |                                                                |
| Gene                                   | Enzyme        | Wt       | AR211    | Oligonucleotides <sup>a</sup>                                  |
| <i>At1g10940</i>                       | <i>BspHI</i>  | 211      | 178, 33  | AGTTGCCAGGCTCATGAAG<br>GTTAAACACCCAATCAGCTAACG                 |
| <i>At1g29540</i>                       | <i>HinfI</i>  | 130, 151 | 281      | CCTAAGGCACAGCAACAC<br>GGAAGAAGAGGAAGAATGAAGCC                  |
| <i>At1g58250</i>                       | <i>BglII</i>  | 211, 30  | 241      | TTAAAGATGTTGAAGCATCTCGAATGAGAT<br>GATGTTCTTCTCAACTCCTGAGC      |
| <i>At1g70950</i>                       | <i>MseI</i>   | 229      | 200, 29  | AGAGTCAATGTGAGTTTGATGAGGAAATT<br>TGTTTCATCGAGTTTCGATCCC        |
| <i>At2g24850</i>                       | <i>FokI</i>   | 159, 174 | 333      | GGTCGCGGAGATGGCTAG<br>ATTGCTTGAACCTGTTGGTG                     |
| <i>At2g44760</i>                       | <i>MseI</i>   | 290      | 225, 65  | GAAATGGCGGAGAAGGATAAGC<br>TCCTACACCTTTCCAAATCCC                |
| <i>At3g01300</i>                       | <i>DdeI</i>   | 262      | 138, 124 | CTACAACCTAGCAATGCAGAAAGC<br>TGACCCTGAAGGCCATCAG                |
| <i>At3g03405</i>                       | <i>HinfI</i>  | 130, 166 | 296      | GGAGAATCTATCTACACAACTGTTGG<br>CATATTGCATGAGATGGGAGAAACC        |
| <i>At3g16880</i>                       | <i>AccI</i>   | 282      | 166, 116 | CAGTAACCTAGAGATGTGGTTTGG<br>AGAATTTCTTTTACAGAGACATCC           |
| <i>At3g21430</i>                       | <i>FokI</i>   | 200, 30  | 230      | TAGTGCCGTGAAAAGCAGCAAAAAGGAT<br>GAGACTAGAACACACCTGCAG          |
| <i>At3g49060</i>                       | $\alpha$ TaqI | 241, 30  | 211      | CACTGAGAAGACTGGTTAAAGGAGAGATCCG<br>CCATATACATAAGATCCTTTACCCGAC |
| <i>At3g56600</i>                       | <i>HaeIII</i> | 177.96   | 273      | TCTAACGGAGTTGGAGCTGC<br>AAGACTAAGCCCTGCAGCAG                   |
| <i>At4g01670</i>                       | <i>AccI</i>   | 352, 30  | 382      | TGAGCTTGAACCGGTCGGGTTTCGTATA<br>GCCCATATTTAATCCCCACC           |
| <i>At4g09870</i>                       | <i>HinfI</i>  | 234      | 204, 30  | GGAAATCGTATGCCTTTCCC<br>CGACAAAAAACTTAGTCCAGGGCAAGAA           |
| <i>At4g12120</i>                       | <i>MfeI</i>   | 150, 171 | 321      | TGCAGATGTATGTCGTGCC<br>GCTCACTGACTGAGGCAAAG                    |
| <i>At4g13370</i>                       | <i>AluI</i>   | 250      | 165, 85  | CGCTTGAATTCGCTACTCC<br>GAGCAAGCGCTTGTCTCAC                     |
| <i>At4g24800</i>                       | <i>XhoI</i>   | 221, 30  | 251      | GACATTTTGAATGAATATGTGGAGACTCGA<br>CAAGAGCAAGATCATCAAGGC        |
| <i>At5g15730</i>                       | <i>HinfI</i>  | 321      | 191, 130 | TGGAACAACCACACCAAGATC                                          |

|                  |         |          |         |                                                                                          |
|------------------|---------|----------|---------|------------------------------------------------------------------------------------------|
| <i>At5g26990</i> | HaeIII  | 187, 30  | 217     | GGGAAATGAGTGGATCTGTACAC<br>GAGAGAGTTTCCTGATGGAAATTTTCAG <u>G</u><br>TGAAGCATACCTTTTCAGGC |
| <i>At5g40360</i> | BspHI   | 300      | 270, 30 | ATAAATATTCGTAGGTTGTTGGTGAGAAT <u>C</u><br>GTTGCCAACTATCTTGTGGACTTC                       |
| <i>At5g46040</i> | Hpy188I | 230, 30  | 260     | ACCCATAAATGGAGGCTCTGTACTATC <u>T</u> CA<br>GCATTGAGAATGTTGTGAAGCC                        |
| <i>At5g53120</i> | Hpy188I | 82, 185  | 267     | GACGACAGTACTCATTCTCTTCC<br>TTCTCGTTCTAGACGACGAGG                                         |
| <i>At5g56450</i> | Hpy188I | 300      | 270, 30 | ATGATGAAGTGAAGAGGTTCTTGAATT <u>C</u> GG<br>TTGAGCTTAGACCAATCCATGTC                       |
| <i>At5g57090</i> | AcI     | 217, 230 | 247     | TCCTCAAGGAATCGTTCCTTTTGT <u>T</u> CCG<br>TTACAGGCAAAGCAACCAGC                            |
| <i>At5g66140</i> | BglII   | 230      | 200, 30 | TACCCAAAGTGGTGGTGTGAGACC <u>T</u> AG<br>CAGAGCACGGATAGCGAG                               |

<sup>a</sup>Underlined nucleotide is the introduced mutation for this dCAPS genotyping marker (MICHAELS AND AMASINO 1998; NEFF *et al.* 1998).
