# Supplementary material for: Abscisic Acid Regulates Root Elongation Through the Activities of Auxin and Ethylene in Arabidopsis thaliana
Source: PubMed Central journal article supplement (PMC4455775; doi:10.1534/g3.114.011080), 2014-05-15
Supplement: supp_g3.114.011080_TableS3.pdf [file supp_g3.114.011080_TableS3.pdf]

**Table S3 Homozygous EMS-related mutations in the AR211 Exome**

| Chromosome | Location <sup>1</sup> | Reference sequence | Mutant sequence | Gene      | Amino acid change | Codon change |
|------------|-----------------------|--------------------|-----------------|-----------|-------------------|--------------|
| 1          | 139060                | C                  | T               | AT1G01355 | P/S               | Cct/Tct      |
| 1          | 561276                | C                  | T               | AT1G02630 | A/T               | Gct/Act      |
| 1          | 723055                | C                  | T               | AT1G03060 | A/T               | Gcg/Acg      |
| 1          | 734475                | C                  | T               | AT1G03080 | D/N               | Gat/Aat      |
| 1          | 960025                | C                  | T               | AT1G03820 | E/K               | Gaa/Aaa      |
| 1          | 1186179               | C                  | T               | AT1G04400 | G/D               | gGt/gAt      |
| 1          | 1411381               | C                  | T               | AT1G04970 | L/F               | Ctc/Ttc      |
| 1          | 1913814               | C                  | T               | AT1G06250 | G/E               | gGa/gAa      |
| 1          | 3658079               | G                  | A               | AT1G10940 | A/V               | gCc/gTc      |
| 1          | 4732699               | G                  | A               | AT1G13800 | R/C               | Cgc/Tgc      |
| 1          | 5390306               | G                  | A               | AT1G15670 | R/Q               | cGg/cAg      |
| 1          | 5677353               | G                  | A               | AT1G16610 | L/F               | Ctt/Ttt      |
| 1          | 5809513               | G                  | A               | AT1G16980 | S/N               | aGt/aAt      |
| 1          | 6313539               | G                  | A               | AT1G18340 | L/F               | Ctt/Ttt      |
| 1          | 6362408               | G                  | A               | AT1G18480 | G/E               | gGg/gAg      |
| 1          | 7101970               | G                  | A               | AT1G20500 | P/L               | cCa/cTa      |
| 1          | 7650632               | G                  | A               | AT1G21760 | R/H               | cGc/cAc      |
| 1          | 8223327               | G                  | A               | AT1G23190 | R/H               | cGt/cAt      |
| 1          | 9118563               | G                  | A               | AT1G26355 | L/F               | Ctt/Ttt      |
| 1          | 9183098               | G                  | A               | AT1G26570 | A/T               | Gct/Act      |
| 1          | 10030338              | G                  | A               | AT1G28520 | E/K               | Gaa/Aaa      |
| 1          | 10327509              | G                  | A               | AT1G29540 | R/K               | aGa/aAa      |
| 1          | 11146522              | G                  | A               | AT1G31190 | A/T               | Gct/Act      |
| 1          | 11858257              | G                  | A               | AT1G32760 | G/S               | Ggt/AgT      |
| 1          | 12379443              | G                  | A               | AT1G34042 | S/F               | tCc/tTc      |
| 1          | 12745064              | G                  | A               | AT1G34760 | L/F               | Ctt/Ttt      |
| 1          | 16277445              | G                  | A               | AT1G43190 | R/C               | Cgt/Tgt      |
| 1          | 17320715              | G                  | A               | AT1G47250 | D/N               | Gat/Aat      |
| 1          | 18105816              | G                  | A               | AT1G48940 | L/F               | Ctt/Ttt      |
| 1          | 18220800              | G                  | A               | AT1G49250 | G/D               | gGc/gAc      |
| 1          | 18679322              | G                  | A               | AT1G50420 | L/F               | Ctt/Ttt      |
| 1          | 19113399              | G                  | A               | AT1G51538 | E/K               | Gaa/Aaa      |
| 1          | 19778471              | G                  | A               | AT1G53070 | G/D               | gGc/gAc      |
| 1          | 19795263              | G                  | A               | AT1G53130 | S/F               | tCc/tTc      |
| 1          | 20080338              | G                  | A               | AT1G53790 | P/S               | Ccg/Tcg      |
| 1          | 20222720              | G                  | A               | AT1G54170 | S/L               | tCa/tTa      |
| 1          | 20865721              | G                  | A               | AT1G55820 | D/N               | Gat/Aat      |
| 1          | 21029118              | G                  | A               | AT1G56190 | G/S               | Ggt/AgT      |
| 1          | 21588781              | G                  | A               | AT1G58250 | S/F               | tCt/tTt      |
| 1          | 21594500              | G                  | A               | AT1G58250 | P/S               | Cca/Tca      |
| 1          | 21762177              | G                  | A               | AT1G58602 | R/K               | aGa/aAa      |
| 1          | 22144577              | G                  | A               | AT1G60070 | S/F               | tCt/tTt      |
| 1          | 23117273              | G                  | A               | AT1G62450 | P/L               | cCg/cTg      |
| 1          | 23936314              | G                  | A               | AT1G64430 | R/K               | aGa/aAa      |
| 1          | 24287328              | G                  | A               | AT1G65380 | S/N               | aGt/aAt      |
| 1          | 24461387              | G                  | A               | AT1G65770 | H/Y               | Cat/Tat      |
| 1          | 24930277              | G                  | A               | AT1G66820 | G/E               | gGa/gAa      |
| 1          | 24943705              | G                  | A               | AT1G66860 | A/T               | Gct/Act      |
| 1          | 25711879              | G                  | A               | AT1G68526 | P/L               | cCg/cTg      |
| 1          | 25904516              | G                  | A               | AT1G68890 | A/T               | Gca/Aca      |

|   |          |   |   |           |     |          |
|---|----------|---|---|-----------|-----|----------|
| 1 | 25923434 | G | A | AT1G68940 | L/F | Ctt/Ttt  |
| 1 | 26753628 | G | A | AT1G70950 | D/N | Gat/Aat  |
| 1 | 26755012 | G | A | AT1G70950 | E/K | Gag/Aag  |
| 1 | 26815470 | G | A | AT1G71100 | A/T | Gcg/Acg  |
| 1 | 27198112 | G | A | AT1G72250 | W/* | tgG/tgA  |
| 1 | 28031987 | G | A | AT1G74630 | W/* | tgG/tgA  |
| 1 | 28114701 | G | A | AT1G74830 | L/F | Ctt/Ttt  |
| 1 | 29456040 | G | A | AT1G78280 | A/T | Gct/Act  |
| 1 | 29972916 | G | A | AT1G79650 | L/F | Ctt/Ttt  |
| 2 | 9529495  | C | T | AT2G22440 | L/F | Ctc/Ttc  |
| 2 | 10584074 | C | T | AT2G24850 | G/R | Gga/Aga  |
| 2 | 11627352 | C | T | AT2G27200 | P/L | cCc/cTc  |
| 2 | 11815196 | C | T | AT2G27700 | M/I | atG/atA  |
| 2 | 13004796 | C | T | AT2G30520 | D/N | Gac/Aac  |
| 2 | 13347629 | C | T | AT2G31300 | G/S | Ggt/Aggt |
| 2 | 13604529 | C | T | AT2G31970 | S/F | tCc/tTc  |
| 2 | 14229078 | C | T | AT2G33610 | P/L | cCc/cTc  |
| 2 | 14267486 | C | T | AT2G33730 | R/K | aGa/aAa  |
| 2 | 14428394 | C | T | AT2G34170 | L/F | Ctc/Ttc  |
| 2 | 15174068 | C | T | AT2G36180 | G/D | gGt/gAt  |
| 2 | 15335766 | C | T | AT2G36570 | P/S | Cca/Tca  |
| 2 | 15405954 | C | T | AT2G36730 | G/D | gGt/gAt  |
| 2 | 17729309 | C | T | AT2G42580 | S/F | tCt/tTt  |
| 2 | 18047784 | C | T | AT2G43465 | G/E | gGa/gAa  |
| 2 | 18454443 | C | T | AT2G44760 | G/S | Ggt/Aggt |
| 2 | 18665617 | C | T | AT2G45260 | A/T | Gct/Act  |
| 2 | 18738519 | C | T | AT2G45460 | R/Q | cGa/cAa  |
| 2 | 19401957 | C | T | AT2G47250 | G/R | Gga/Aga  |
| 2 | 19478628 | C | T | AT2G47460 | R/C | Cgt/Tgt  |
| 3 | 92622    | C | T | AT3G01300 | G/R | Gga/Aga  |
| 3 | 331987   | C | T | AT3G01990 | S/F | tCt/tTt  |
| 3 | 625634   | C | T | AT3G02860 | V/I | Gtt/Att  |
| 3 | 792554   | C | T | AT3G03350 | L/F | Ctt/Ttt  |
| 3 | 809888   | C | T | AT3G03405 | R/Q | cGa/cAa  |
| 3 | 1497902  | C | T | AT3G05260 | A/T | Gcg/Acg  |
| 3 | 1532686  | C | T | AT3G05360 | S/N | aGc/aAc  |
| 3 | 1721097  | C | T | AT3G05790 | A/T | Gcg/Acg  |
| 3 | 2783357  | C | T | AT3G09090 | E/K | Gag/Aag  |
| 3 | 3835399  | C | T | AT3G12040 | A/T | Gca/Aca  |
| 3 | 4252189  | C | T | AT3G13222 | E/K | Gaa/Aaa  |
| 3 | 5097716  | C | T | AT3G15130 | E/K | Gaa/Aaa  |
| 3 | 5462454  | C | T | AT3G16110 | E/K | Gag/Aag  |
| 3 | 5723741  | C | T | AT3G16810 | A/T | Gcg/Acg  |
| 3 | 5767183  | C | T | AT3G16880 | R/C | Cgc/Tgc  |
| 3 | 6112950  | C | T | AT3G17850 | D/N | Gat/Aat  |
| 3 | 6193177  | C | T | AT3G18080 | L/F | Ctt/Ttt  |
| 3 | 6276323  | C | T | AT3G18290 | S/F | tCt/tTt  |
| 3 | 6384180  | C | T | AT3G18550 | P/S | Cca/Tca  |
| 3 | 7550168  | C | T | AT3G21430 | R/K | aGa/aAa  |
| 3 | 8179479  | C | T | AT3G23020 | G/R | Ggg/Agg  |
| 3 | 8617009  | C | T | AT3G23860 | V/I | Gtt/Att  |
| 3 | 8806375  | C | T | AT3G24300 | G/E | gGg/gAg  |
| 3 | 9661903  | C | T | AT3G26380 | P/S | Cct/Tct  |
| 3 | 9792146  | C | T | AT3G26630 | G/E | gGa/gAa  |

|   |          |   |   |           |     |          |
|---|----------|---|---|-----------|-----|----------|
| 3 | 9915941  | C | T | AT3G26910 | A/T | Gca/Aca  |
| 3 | 10985368 | C | T | AT3G28960 | G/S | Ggt/Aggt |
| 3 | 11729342 | C | T | AT3G29810 | T/I | aCt/aTt  |
| 3 | 18188669 | C | T | AT3G49060 | G/E | gGa/gAa  |
| 3 | 18528294 | C | T | AT3G49970 | A/T | Gca/Aca  |
| 3 | 18694933 | C | T | AT3G50380 | D/N | Gat/Aat  |
| 3 | 19895848 | C | T | AT3G53680 | A/T | Gca/Aca  |
| 3 | 20706123 | C | T | AT3G55780 | S/F | tCt/tTt  |
| 3 | 20969987 | C | T | AT3G56600 | P/S | Cct/Tct  |
| 4 | 37193    | G | A | AT4G00100 | G/R | Gga/Agga |
| 4 | 203800   | G | A | AT4G00450 | G/E | gGg/gAg  |
| 4 | 269723   | G | A | AT4G00650 | G/E | gGg/gAg  |
| 4 | 419631   | G | A | AT4G00970 | D/N | Gat/Aat  |
| 4 | 711931   | G | A | AT4G01670 | S/F | tCc/tTc  |
| 4 | 894797   | G | A | AT4G02030 | E/K | Gag/Aag  |
| 4 | 6200956  | G | A | AT4G09870 | G/D | gGt/gAt  |
| 4 | 6299728  | G | A | AT4G10070 | T/M | aCg/aTg  |
| 4 | 6416798  | G | A | AT4G10350 | P/L | cCt/cTt  |
| 4 | 6783448  | G | A | AT4G11130 | D/N | Gac/Aac  |
| 4 | 6988567  | G | A | AT4G11530 | R/K | aGg/aAg  |
| 4 | 7258522  | G | A | AT4G12120 | Q/* | Caa/Taa  |
| 4 | 7315373  | G | A | AT4G12320 | L/F | Ctt/Ttt  |
| 4 | 7409891  | G | A | AT4G12490 | S/F | tCt/tTt  |
| 4 | 7614091  | G | A | AT4G13040 | E/K | Gaa/Aaa  |
| 4 | 7779985  | G | A | AT4G13370 | P/L | cCg/cTg  |
| 4 | 9052848  | G | A | AT4G15975 | G/E | gGa/gAa  |
| 4 | 9067901  | G | A | AT4G16008 | E/K | Gaa/Aaa  |
| 4 | 9810849  | G | A | AT4G17610 | P/S | Cca/Tca  |
| 4 | 9923398  | G | A | AT4G17850 | D/N | Gat/Aat  |
| 4 | 9942510  | G | A | AT4G17895 | E/K | Gaa/Aaa  |
| 4 | 10373483 | G | A | AT4G18940 | D/N | Gac/Aac  |
| 4 | 10746919 | G | A | AT4G19750 | T/I | aCc/aTc  |
| 4 | 10988610 | G | A | AT4G20350 | R/K | aGa/aAa  |
| 4 | 11157007 | G | A | AT4G20830 | G/R | Gga/Agga |
| 4 | 11577582 | G | A | AT4G21820 | A/T | Gct/Act  |
| 4 | 12700257 | G | A | AT4G24600 | V/M | Gtg/Atg  |
| 4 | 12783682 | G | A | AT4G24800 | E/K | Gag/Aag  |
| 4 | 13302839 | G | A | AT4G26270 | S/F | tCt/tTt  |
| 4 | 13922668 | G | A | AT4G27980 | S/N | aGc/aAc  |
| 4 | 15434283 | G | A | AT4G31900 | A/T | Gca/Aca  |
| 4 | 15445308 | G | A | AT4G31920 | S/F | tCt/tTt  |
| 4 | 16918583 | G | A | AT4G35680 | A/T | Gca/Aca  |
| 4 | 17942085 | G | A | AT4G38280 | D/N | Gat/Aat  |
| 5 | 429342   | G | A | AT5G02170 | G/R | Gga/Agga |
| 5 | 1068539  | G | A | AT5G03960 | P/S | Ccg/Tcg  |
| 5 | 1209773  | G | A | AT5G04320 | E/K | Gag/Aag  |
| 5 | 1372241  | G | A | AT5G04750 | A/T | Gct/Act  |
| 5 | 1941097  | G | A | AT5G06350 | R/H | cGt/cAt  |
| 5 | 2127579  | G | A | AT5G06850 | S/F | tCt/tTt  |
| 5 | 2344427  | G | A | AT5G07400 | R/K | aGa/aAa  |
| 5 | 2350767  | G | A | AT5G07420 | A/T | Gcg/Acg  |
| 5 | 2411992  | G | A | AT5G07630 | R/Q | cGg/cAg  |
| 5 | 2744997  | G | A | AT5G08480 | G/D | gGc/gAc  |
| 5 | 2883284  | G | A | AT5G09290 | E/K | Gag/Aag  |

|   |          |   |   |           |     |         |
|---|----------|---|---|-----------|-----|---------|
| 5 | 3026507  | G | A | AT5G09750 | P/L | cCg/cTg |
| 5 | 3551582  | G | A | AT5G11160 | G/D | gGc/gAc |
| 5 | 3784369  | G | A | AT5G11740 | V/I | Gtc/Atc |
| 5 | 3805942  | G | A | AT5G11800 | A/V | gCt/gTt |
| 5 | 3863428  | G | A | AT5G11970 | T/M | aCg/aTg |
| 5 | 3937794  | G | A | AT5G12180 | G/E | gGg/gAg |
| 5 | 4756942  | G | A | AT5G14730 | D/N | Gat/Aat |
| 5 | 4959462  | G | A | AT5G15270 | G/E | gGa/gAa |
| 5 | 5131730  | G | A | AT5G15730 | G/E | gGa/gAa |
| 5 | 5253530  | G | A | AT5G16080 | S/F | tCc/tTc |
| 5 | 5872278  | G | A | AT5G17790 | P/S | Cca/Tca |
| 5 | 6136517  | G | A | AT5G18490 | S/F | tCc/tTc |
| 5 | 6447214  | G | A | AT5G19170 | G/D | gGc/gAc |
| 5 | 6687316  | G | A | AT5G19780 | M/I | atG/atA |
| 5 | 6716199  | G | A | AT5G19870 | L/F | Ctt/Ttt |
| 5 | 7376608  | G | A | AT5G22290 | A/V | gCc/gTc |
| 5 | 7918346  | G | A | AT5G23480 | D/N | Gat/Aat |
| 5 | 8052616  | G | A | AT5G23880 | V/I | Gtc/Atc |
| 5 | 9493106  | G | A | AT5G26990 | S/N | aGc/aAc |
| 5 | 9571457  | G | A | AT5G27200 | A/T | Gct/Act |
| 5 | 9822363  | G | A | AT5G27730 | G/D | gGt/gAt |
| 5 | 10780921 | G | A | AT5G28740 | E/K | Gag/Aag |
| 5 | 14720407 | G | A | AT5G37180 | G/S | Ggt/Agt |
| 5 | 15281640 | G | A | AT5G38250 | A/V | gCt/gTt |
| 5 | 16145916 | G | A | AT5G40360 | V/M | Gtg/Atg |
| 5 | 16853788 | G | A | AT5G42180 | D/N | Gat/Aat |
| 5 | 18672194 | C | T | AT5G46040 | E/K | Gaa/Aaa |
| 5 | 18931148 | C | T | AT5G46650 | R/W | Cgg/Tgg |
| 5 | 21182641 | C | T | AT5G52130 | E/K | Gag/Aag |
| 5 | 22858782 | C | T | AT5G56450 | G/E | gGa/gAa |
| 5 | 23097145 | C | T | AT5G57070 | P/S | Cct/Tct |
| 5 | 23104210 | C | T | AT5G57090 | A/V | gCc/gTc |
| 5 | 24115961 | C | T | AT5G59870 | A/T | Gcc/Acc |
| 5 | 25166804 | C | T | AT5G62680 | G/E | gGg/gAg |
| 5 | 25685612 | C | T | AT5G64210 | R/K | aGa/aAa |
| 5 | 26052558 | C | T | AT5G65207 | E/K | Gag/Aag |
| 5 | 26437907 | C | T | AT5G66140 | G/D | gGt/gAt |

<sup>1</sup>Basepair location on chromosome 2 in TAIR v10
